# Supplementary material for: Hierarchical self-assembly in an RNA-based coordination polymer hydrogel
Source: Royal Society of Chemistry journal article supplement (doi:10.1039/d3dt00634d), 2023-01-01
Supplement: d3dt00634d1.pdf [file d3dt00634d1.pdf]

## Supplementary Information

### Hierarchical self-assembly in an RNA-based coordination polymer hydrogel

Osama El-Zubir,<sup>1</sup> Pablo Rojas Martinez,<sup>1</sup> Gema Dura,<sup>2</sup> Cameron Doherty,<sup>1</sup> Fabio Cucinotta,<sup>1</sup> Lewis E.

Mackenzie,<sup>3</sup> Robert Pal,<sup>3</sup> Benjamin R. Horrocks,<sup>1</sup> Andrew Houlton<sup>1</sup>

<sup>1</sup> *Chemical Nanoscience Labs, Chemistry, School of Natural and Environmental Sciences, Newcastle University, Newcastle upon Tyne, NE1 7RU, U.K.*

<sup>2</sup> *Departamento de Química Inorgánica, Orgánica y Bioquímica, Facultad de Ciencias y Tecnologías Químicas, UCLM, Spain.*

<sup>3</sup> *Department of Chemistry, Durham University, South Road, Durham, DH1 3LE, UK.*

\* *Corresponding author. Email: andrew.houlton@ncl.ac.*

#### Table of contents

|                                                                                 |    |
|---------------------------------------------------------------------------------|----|
| 1. METHODS .....                                                                | 2  |
| 1.1 Materials .....                                                             | 2  |
| 1.2. Preparation of <b>1</b> .....                                              | 2  |
| 1.3. FTIR spectroscopy .....                                                    | 2  |
| 1.4. Matrix-assisted laser desorption/ionization Spectrometry (MALDI-Tof) ..... | 2  |
| 1.5. Ultraviolet-Visible Spectroscopy (UV-Vis) .....                            | 2  |
| 1.6. X-ray photoelectron spectroscopy .....                                     | 2  |
| 1.7. Atomic Force Microscopy (AFM) .....                                        | 2  |
| 1.8. Circular dichroism .....                                                   | 2  |
| 1.9. Rheology .....                                                             | 2  |
| 1.10. Fluorescence spectroscopy .....                                           | 2  |
| 1.11. Excited-state lifetime measurements .....                                 | 2  |
| 1.12 Circularly polarized luminescence (CPL) .....                              | 3  |
| 1.13 Modelling.....                                                             | 3  |
| 2. Supplementary Figures .....                                                  | 4  |
| 3. References .....                                                             | 14 |

## 1. Methods

**1.1. Materials.** All reagents were purchased from Sigma-Aldrich. Deionised water (18 M $\Omega$  cm resistivity) was obtained from a Direct-Q® 3 UV Water Purification System (Merck).

**1.2. Preparation of 1.** Samples of Cu<sup>I</sup>-thioguanosine, [(Cu(I)- $\mu^3$ -S(-)-6tG)<sub>n</sub>] **1**, as a hydrogel were prepared as follows. An aqueous suspension of 6-thioguanosine (6TG-H) was sonicated for 30 min to achieve a fine dispersion. A molar equivalent weight of copper(I) tetrakis(acetonitrile) hexafluorophosphate was added to the suspension of 6TG-H. After the addition of the Cu(I) ion, the mixture was stirred magnetic stirrer for an hour. A yellow solution is formed which becomes more viscous over time, transforming after ~28 days into an orange gel.

**1.3. FTIR spectroscopy.** An IRAffinity-1S Fourier transform infrared spectrophotometer (Shimadzu) equipped with an ATR accessory has been used to record FTIR spectra in the range of 400 to 4000 cm<sup>-1</sup> wavenumbers at 4 cm<sup>-1</sup> spectral resolution. Each spectrum was generated by co-adding and averaging 64 scans. The bare ATR accessory served as the background. Prior to analysis, a hydrogel **1** sample was deposited onto a clean p-Si(100) chip (1 cm<sup>2</sup>) and air-dried for one day. (Supplementary Fig. 1)

**1.4. Matrix-assisted laser desorption/ionization Spectrometry (MALDI-ToF).** A Bruker Autoflex II ToF/ToF Mass Spectrometer was used to record the MALDI spectra. To prepare the sample, hydrogel **1** (60 mmol l<sup>-1</sup>) was diluted 100-fold in ultrapure water, and then 1  $\mu$ l of the diluted solution was mixed with 9  $\mu$ L of an acetonitrile solution of  $\alpha$ -cyano-4-hydroxycinnamic acid as the matrix.

**1.5. Ultraviolet-Visible Spectroscopy (UV-Vis).** Absorption spectra between 190 and 850nm were recorded in a NanoDrop™ OneC UV-Vis spectrophotometer. UV-Vis spectra of aqueous solutions of 6-thioguanosine at concentrations of 1 mmol l<sup>-1</sup> and of a fresh and aged solution of **1** at concentrations of 1 mmol l<sup>-1</sup> were recorded in a quartz cuvette with pathlength 2 mm. The spectrometer was blanked using nanopure water.

**1.6. X-ray photoelectron spectroscopy.** The Thermo Scientific K-Alpha X-ray photoelectron spectrometer (Thermo Electron Corp., East Grinstead, UK) with an Al K $\alpha$  X-ray source (1486.6 eV) was utilized to obtain XPS spectra. A take-off angle of 90° was employed during data acquisition, and a charge neutralization gun used to compensate for surface charging. High-resolution spectra of the individual core orbitals were acquired at a pass energy of 50 eV and 0.1 eV/step. The XPS spectra were analyzed and curve-fitted using CasaXPs software (Casa, <http://www.casaxps.com>, UK). All spectra were corrected to hydrocarbon C1s peak at binding energy of 285 eV as reference.

**1.7. Atomic Force Microscopy (AFM).** Multimode 8 atomic force microscope with a NanoscopeV controller (Bruker), and an "E" scanner was used to obtain AFM data. The microscope was controlled using Nanoscope software version 9.1, and operated in ScanAsyst in Air mode as a peak force tapping mode at ultra-low forces minimise damage to the samples. To reduce vibrational noise, an isolation table/acoustic enclosure (from Veeco Inc., Metrology Group) was employed. Imaging was done using silicon tips on silicon nitride cantilevers (ScanAsyst, Bruker), with a nominal tip radius of approximately 2 nm, resonant frequency of 150 kHz, and spring constant k ~0.7 Nm<sup>-1</sup>. The AFM data were analyzed with NanoScope Analysis 1.5 software (Bruker). To prepare the sample, 2  $\mu$ l of freshly prepared dilute aqueous solution of **1** was added onto a mica surface and dried in air.

**1.8. Circular dichroism.** Circular dichroism spectra were recorded on a Jasco J-810 Jasco J-810 Spectropolarimeter. CD spectra of a solution of an aqueous solution of 6-thioguanosine and **1** (both at concentration of 10 mM) were recorded in a quartz cell with pathlength 0.1 mm.

**1.9. Rheology.** Rheological measurements were performed with a HR-2 Discovery Hybrid Rheometer (TA Instruments) with a standard steel parallel-plate geometry of 20 mm diameter with a gap of 1 mm. The strain and the frequency were set to 1% and 1 Hz, respectively.

**1.10. Fluorescence spectroscopy.** Emission spectroscopy was recorded on a SPEX Fluoromax spectrofluorimeter. Emission spectra were recorded on a solution of 6-thioguanosine at concentration of 30 mmol l<sup>-1</sup> in 0.1 mol l<sup>-1</sup> of NaOH, excitation at 350 nm. Emission spectra of **1** were measured on a solution at concentration of 30 mmol l<sup>-1</sup> (as-prepared and after gelation), excitation at 470 nm. The spectra were recorded in a quartz cuvette with a path length of 0.2 cm.

**1.11. Excited-state lifetime measurements.** Luminescence spectra and excited state lifetimes were measured using an Edinburgh FLS980 photoluminescence spectrometer, equipped with a 450W Xenon arc lamp, Czerny Turner excitation and emission monochromators (1.8 nm/mm dispersion; 1800 grooves/mm), time-correlated single photon counting (TCSPC) module and a Hamamatsu R928 P photomultiplier tube (in a fan assisted TE cooled housing, operating temperature  $-20^{\circ}\text{C}$ ). Emission spectra were recorded on a solution of 6-thioguanosine (1 and 30  $\text{mmol l}^{-1}$ ) in 0.1  $\text{mol l}^{-1}$  of NaOH. Emission spectra of **1** were measured on a solution at concentration 1  $\text{mmol l}^{-1}$  and a gel at concentration 30  $\text{mmol l}^{-1}$ . The spectra were recorded in a quartz cuvette with a path length of 0.2 cm. For lifetime measurements, samples were excited with an EPL-375 (370.8 nm; 61.1 ps pulse width) and an EPL-475 (471.8 nm; 61.1 ps pulse width) picosecond pulsed diode lasers and data analysis was performed on the F980 software with numerical data reconvolution based on Marquardt-Levenberg algorithm.

**1.12 Circularly polarized luminescence (CPL).** CPL spectra were recording using a custom-build CPL spectrometer. Full details of this CPL spectrometer have been reported by Carr et al.<sup>1</sup> Non-standard protocols were followed to measure CPL from the gel samples. Total emission and CPL emission were sampled at 400 - 800 nm in 5 nm increments, with 10 accumulated spectra per measurement. Roughly 500 micro-liters of the gel sample was contained in an open-topped quartz cuvette (101-10-40, Hellma). The gel adhered to a corner of the cuvette. Excitation was provided by a 410 nm laser source from directly above the sample. The laser and sample were positioned to maximise emission intensity from the sample. Data was processed using custom-written Matlab scripts (Matlab 2019b, Mathworks). Instrumental baselines for total emission intensity and CPL emission were subtracted to zero measurements as appropriate and were then smoothed using an intensity-preserving Savitzky-Golay filter.  $g_{\text{lum}}$  values for each repeated measurement were calculated from smoothed intensity and smoothed CPL emission.

**1.13 Modelling.** Spartan 16 ver. 2.0.9 (Wavefunction Inc.) was used for model building and figures produced using UCSF Chimera 1.11.2.

## 2. Supplementary Figures

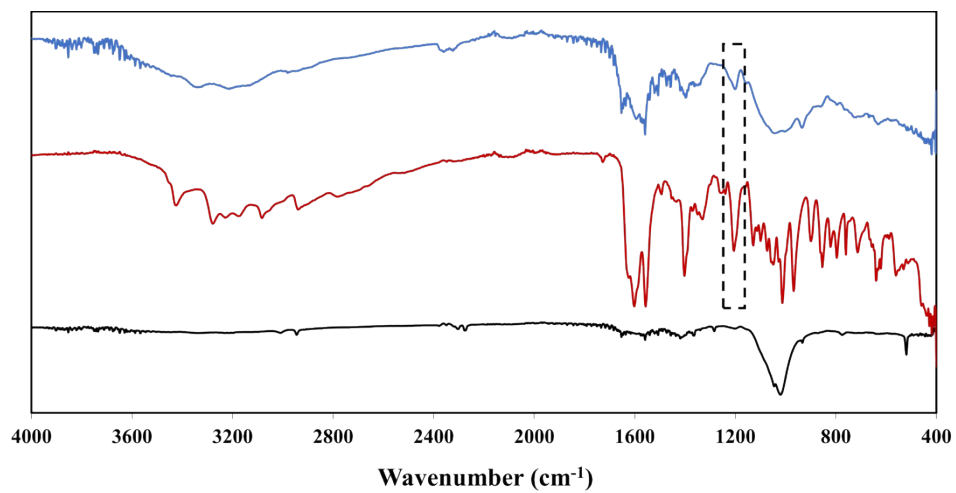

**Supplementary Figure 1.** FTIR spectrum of 1 xerogel (blue), 6-thioguanosine (red) and Cu(MeCN)<sub>4</sub>BF<sub>4</sub> (black). The band indicated at ~1200 cm<sup>-1</sup> is attributed to (C=S) in 6-thioguanosine.

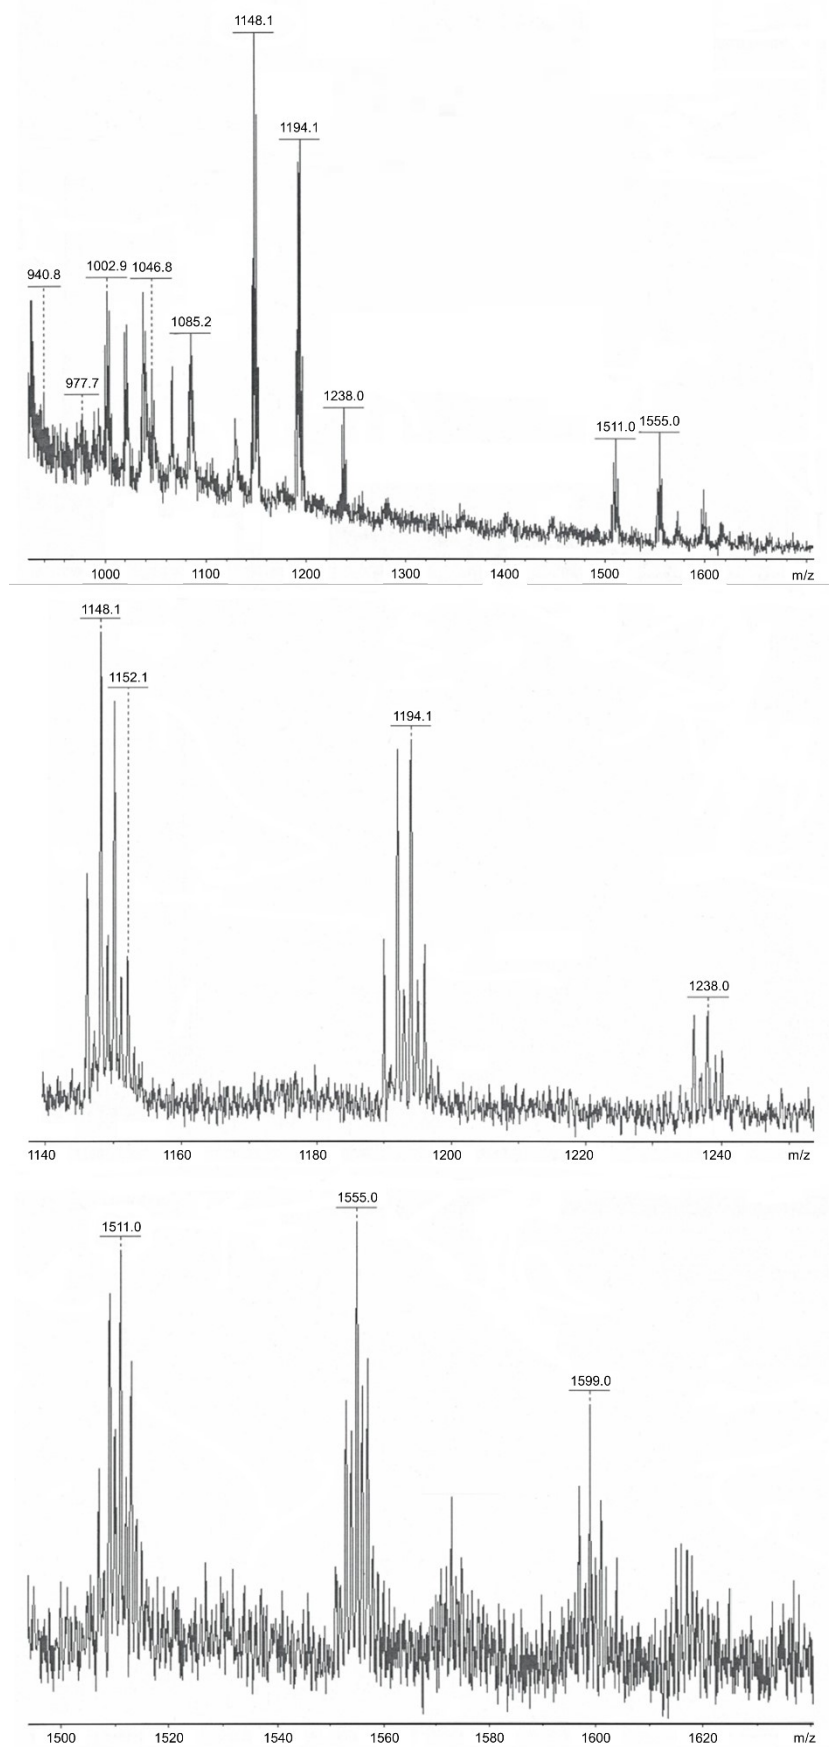

Supplementary Figure 2. MALDI-MS data measured for 1.

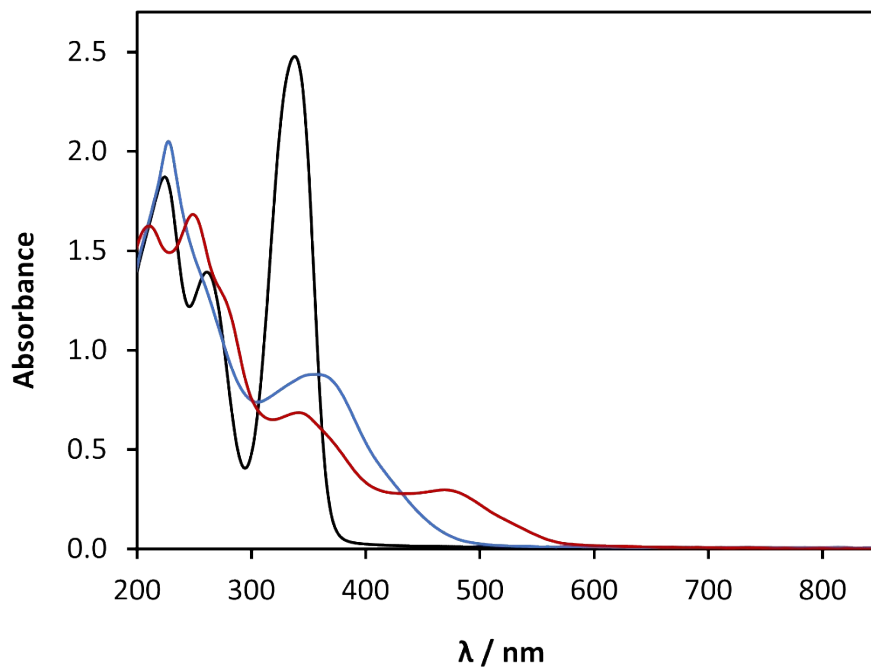

**Supplementary Figure 3.** UV-Vis absorption spectrum of an aqueous solution of 6-TGH at a concentration of  $1 \text{ mmol l}^{-1}$  (black), and absorption spectra of a fresh solution (blue) and aged solution (red) of **1**. Both solutions of **1** were prepared at concentration of  $30 \text{ mmol l}^{-1}$  and diluted to  $1 \text{ mmol l}^{-1}$ .

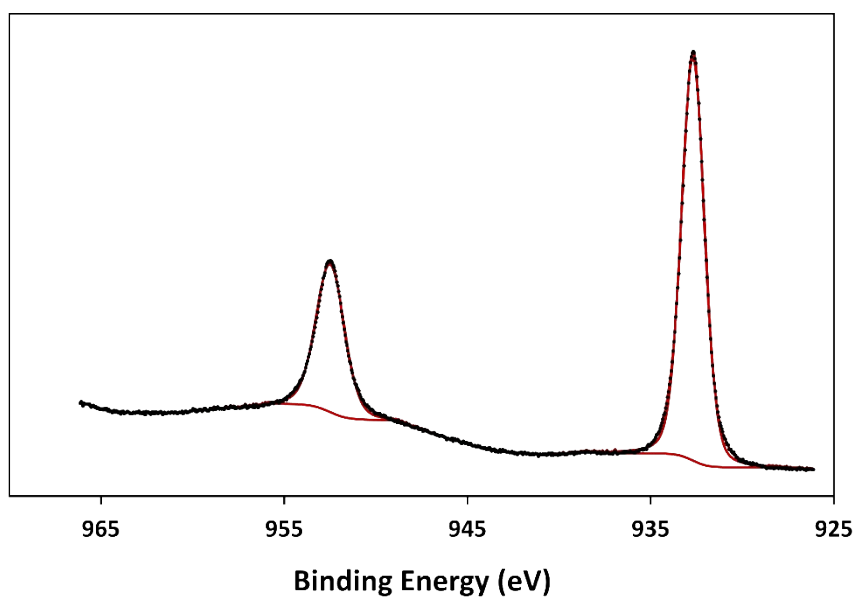

**Supplementary Figure 4.** High-resolution XPS core level spectrum of Cu  $2p_{1/2}$  and  $2p_{3/2}$  region that was recorded on xerogel **1**.

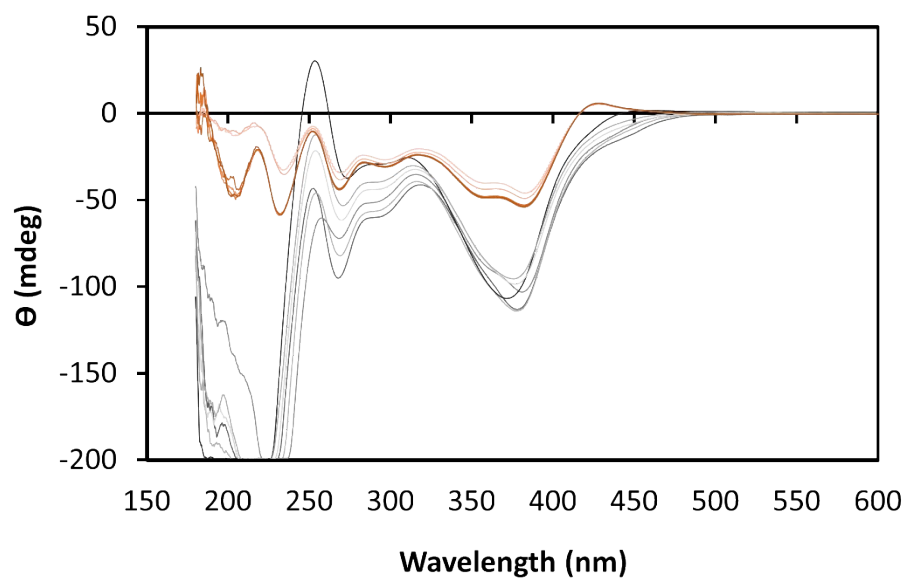

**Supplementary Figure 5.** CD spectrum of solutions of **1** at a concentration of  $10 \text{ mmol l}^{-1}$  when they are fresh (orange) and after 28 days/4 weeks (black). These spectra are from 6 experimental repeats.

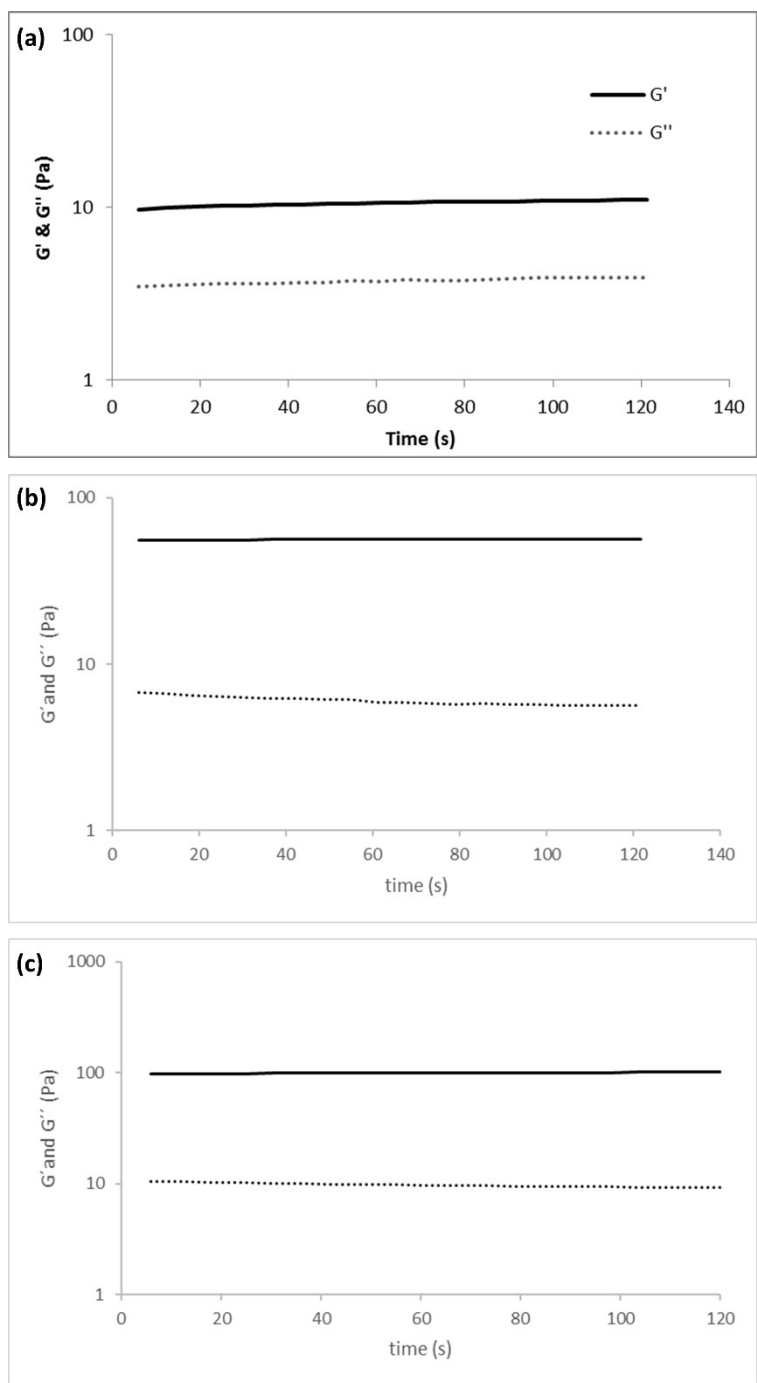

**Supplementary Figure 6.** Time sweep experiments of hydrogels of **1** at 30 mM. (a) Fresh sample, (b) 5 days of gelation and (c) 4 weeks of gelation.



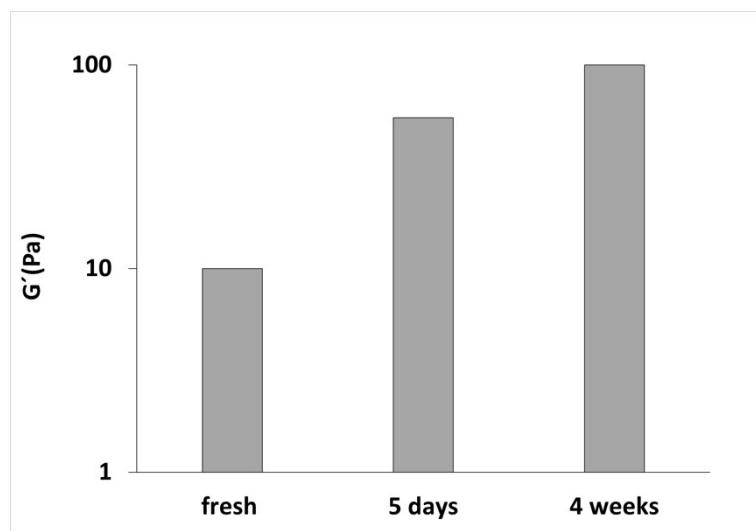

**Supplementary Figure 7.**  $G'$  values of samples of hydrogels of **1** at 30 mM at different times of gelation.

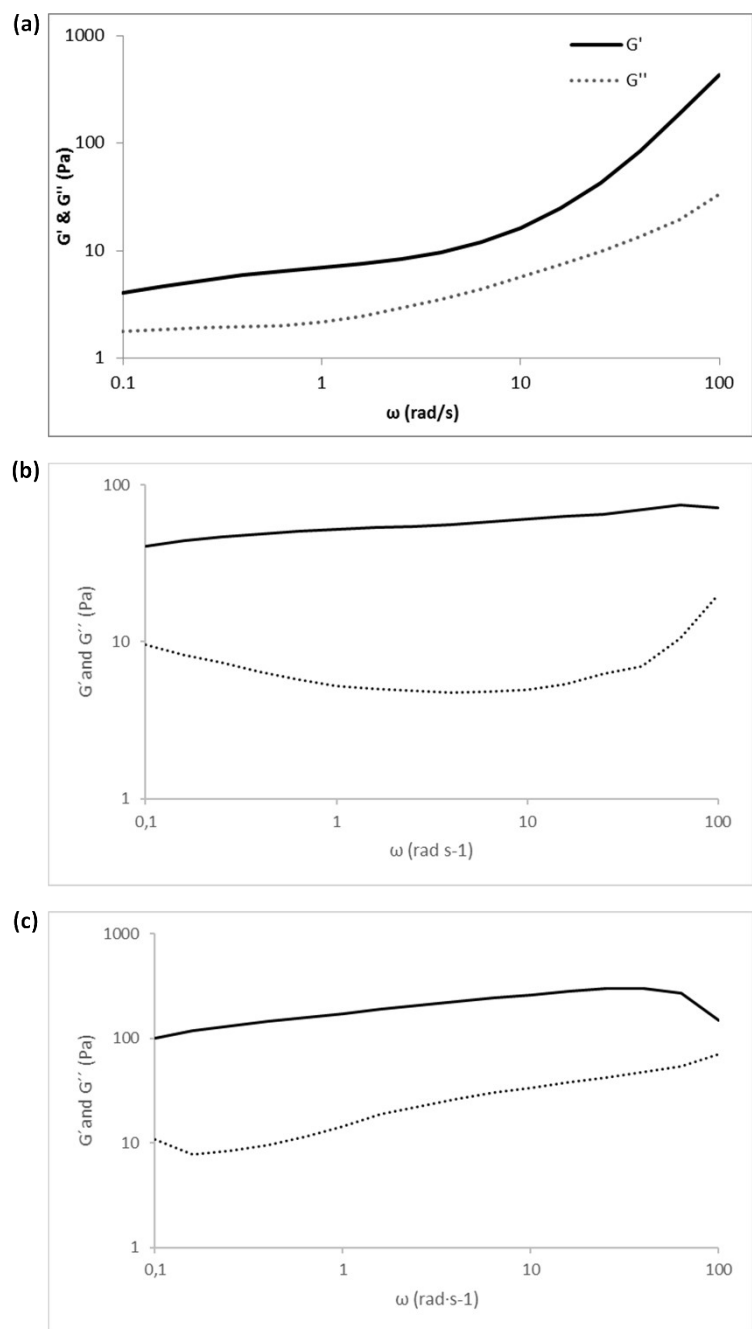

**Supplementary Figure 8.** Frequency sweep experiments of hydrogels of **1** at 30 mM. (a) Fresh sample. (b) 5 days of gelation. (c) 4 weeks of gelation.

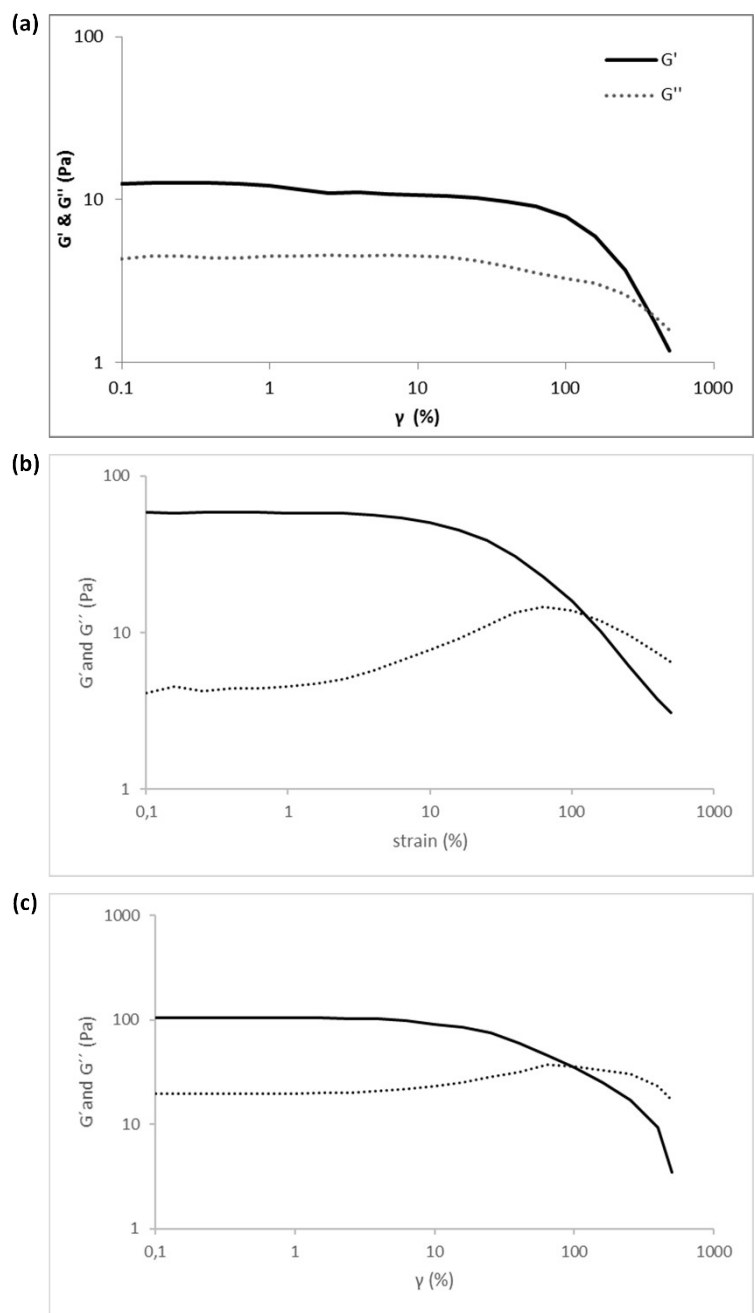

**Supplementary Figure 9.** Strain sweep experiments of hydrogels of **1** at 30 mM. (a) Fresh sample. (b) 5 days of gelation. (c) 4 weeks of gelation.

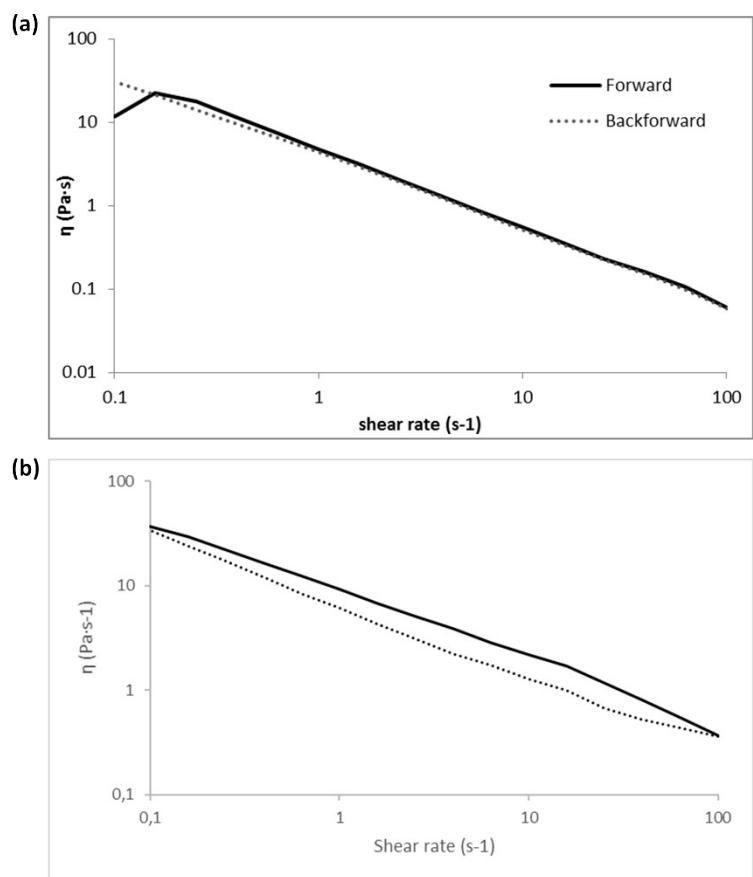

**Supplementary Figure 10.** Shear rate experiments of hydrogels of **1** at 30 mM. (a) Fresh sample. (b) 5 days of gelation.

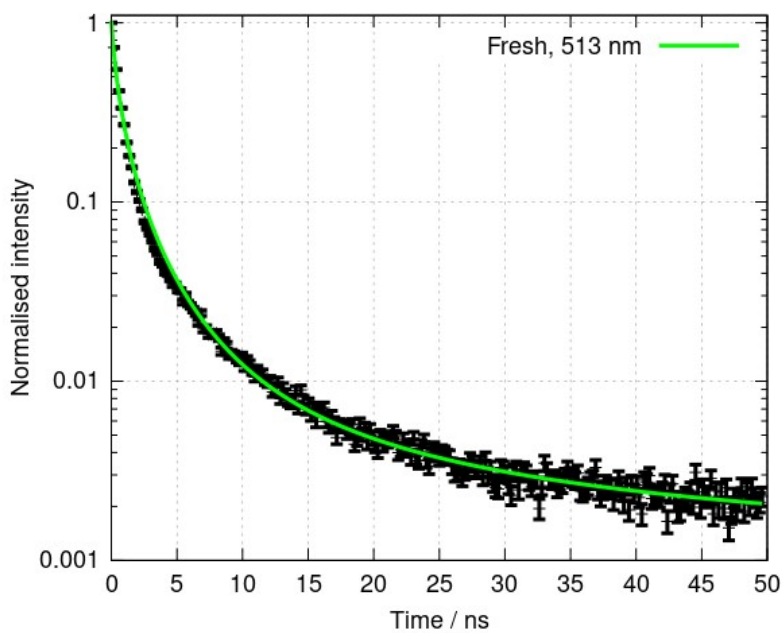

**Supplementary Figure 11.** Semi-logarithmic plot of the excited-state decay profile of fresh hydrogel **1**, recorded at 513 nm using a 371 nm laser.

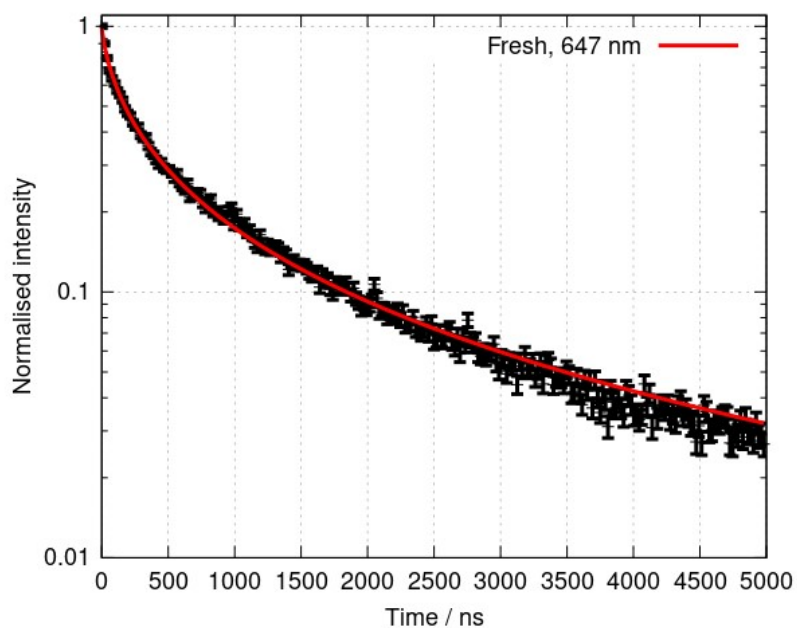

**Supplementary Figure 12.** Semi-logarithmic plot of the excited-state decay profile of fresh hydrogel **1**, recorded at 647 nm using a 371 nm laser.

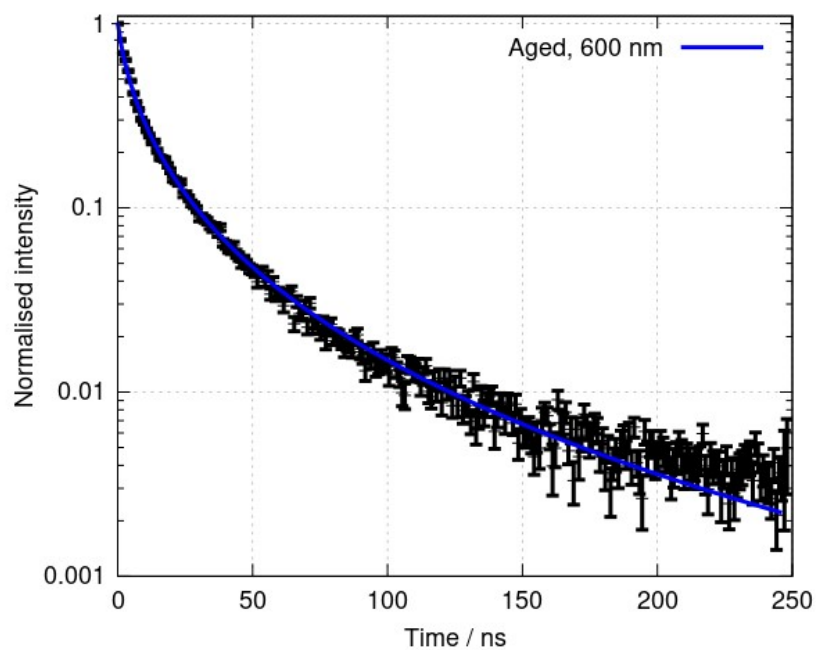

**Supplementary Figure 13.** Semi-logarithmic plot of the excited-state decay profile of the aged hydrogel **1**, recorded at 600 nm using a 371 nm laser.

#### References

1. R. Carr, R. Puckrin, B. K. McMahon, R. Pal, D. Parker and L. O. Palsson, *Methods Appl. Fluoresc.*, 2014, **2**.
